# Supplementary material
Source: Springer Nature journal article supplement (https://www.springermedizin.de/resource/supplementary/12913_2009_1071_MOESM1_ESM.pdf/9536270)

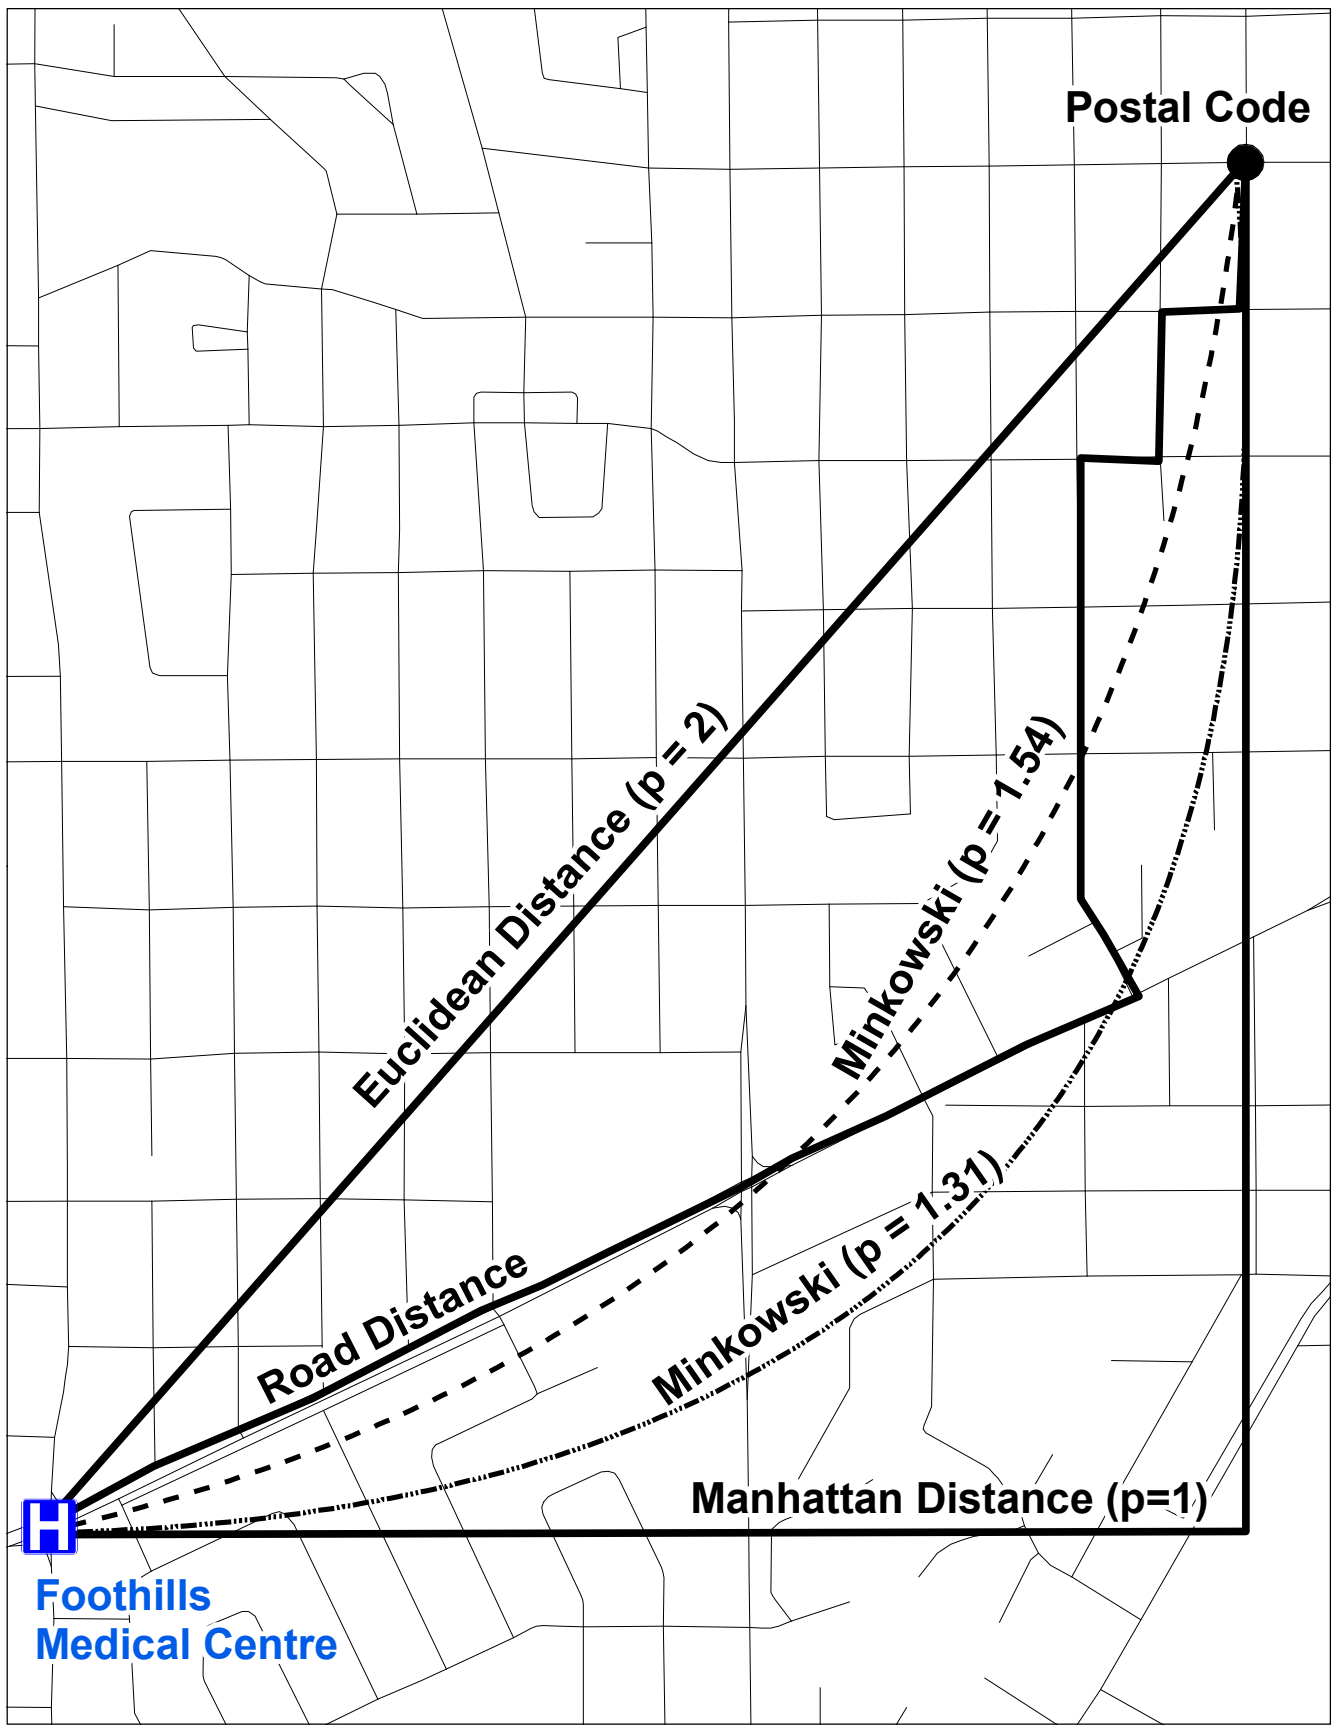

  
**Foothills  
Medical Centre**

**Postal Code**

0      0.2      0.4      0.8 Kilometers

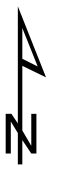

Supplement: MOESM1 [file 9536270]
